# Supplementary material for: Cytotoxicological pathways induced after nanoparticle exposure: studies of oxidative stress at the ‘nano–bio’ interface
Source: Royal Society of Chemistry journal article supplement (doi:10.1039/c7tx00119c), 2017-01-01
Supplement: c7tx00119c1.pdf [file c7tx00119c1.pdf]

**Supplemental Information.** The number of papers returned using “nano\*” against each of the following pathway-related keywords.

| Pathway-related keywords                                       | Scopus results | PubMed results | Web of Science results |
|----------------------------------------------------------------|----------------|----------------|------------------------|
| Caspase 8                                                      | 435            | 15             | 315                    |
| Mitogen activated protein kinases                              | 1,555          | 78             | 428                    |
| C Jun N terminal kinase                                        | 96             | 16             | 103                    |
| Extracellular signal regulated kinases                         | 355            | 80             | 310                    |
| Nuclear factor kappa-light-chain-enhancer of activated B cells | 13             | 1              | 12                     |
| Nuclear factor erythroid derived 2 like 2                      | 12             | 3              | 8                      |
| DNA damage repair                                              | 458            | 114            | 473                    |
| Cell cycle arrest                                              | 1154           | 79             | 1113                   |
| p53                                                            | 1466           | 114            | 1276                   |
| Janus kinase signal transducers activators of transcription    | 25             | 2              | 24                     |
| Transforming growth factor beta                                | 991            | 86             | 437                    |
| Mothers against decapentaplegic                                | 2              | 0              | 2                      |

| Abbreviated pathway-related keywords | Scopus results | PubMed results | Web of Science results |
|--------------------------------------|----------------|----------------|------------------------|
| CASP8                                | 28             | 17             | 7                      |
| MAPK                                 | 519            | 56             | 551                    |
| JNK                                  | 259            | 32             | 240                    |
| ERK                                  | 491            | 61             | 501                    |
| NF kappa B                           | 457            | 63             | 1216                   |
| Nrf2                                 | 171            | 27             | 146                    |
| DDR                                  | 61             | 8              | 53                     |
| Cell cycle arrest                    | 1154           | 79             | 1113                   |
| p53                                  | 1466           | 114            | 1276                   |
| JAK-STAT                             | 39             | 1              | 43                     |
| TGF beta                             | 440            | 101            | 807                    |
| SMAD                                 | 161            | 16             | 131                    |
